# Supplementary material for: DNA targeting by the type I-G and type I-A CRISPR–Cas systems of Pyrococcus furiosus
Source: PubMed Central journal article supplement — Nucleic Acids Res. 2015 Oct 30;43(21):10353–63. doi: 10.1093/nar/gkv1140 (PMC4666368; doi:10.1093/nar/gkv1140), 2015-10-30
Supplement: supp_gkv1140_nar-02649-h-2015-File007.pdf [file supp_gkv1140_nar-02649-h-2015-File007.pdf]

## **Supplementary Material for**

### **DNA Targeting by the Type I-G and Type I-A CRISPR-Cas Systems of *Pyrococcus furiosus***

Joshua Elmore, Trace Deighan, Jan Westpheling, Rebecca M. Terns,  
Michael P. Terns

## Supplemental Figure S1

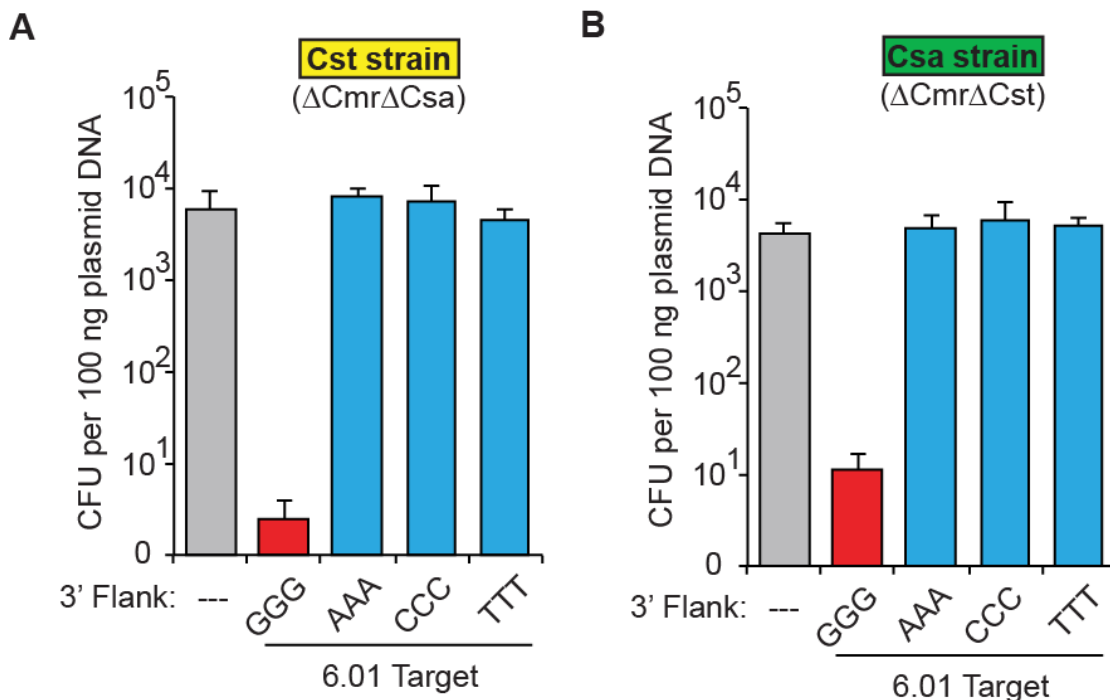

**Supplemental Figure S1. *P. furiosus* Cst and Csa CRISPR-Cas systems silence plasmid DNA in a PAM-dependent manner.** Plots of plasmid challenge assay results in *Pfu* strains harboring the Cst (**A**) or Csa (**B**) CRISPR-Cas systems. Colony forming units are plotted on the Y-axis, with the standard deviation in 3 replicates indicated by error bars. The CRISPR target and the sequence immediately downstream (3' flank) are indicated on the X-axis. Additionally, bar color indicates plasmids with no target (gray), with a CRISPR target and a predicted PAM (red) or predicted non-PAM (blue). The name and genotype of the assayed strain is indicated above each panel.

## Supplemental Figure S2

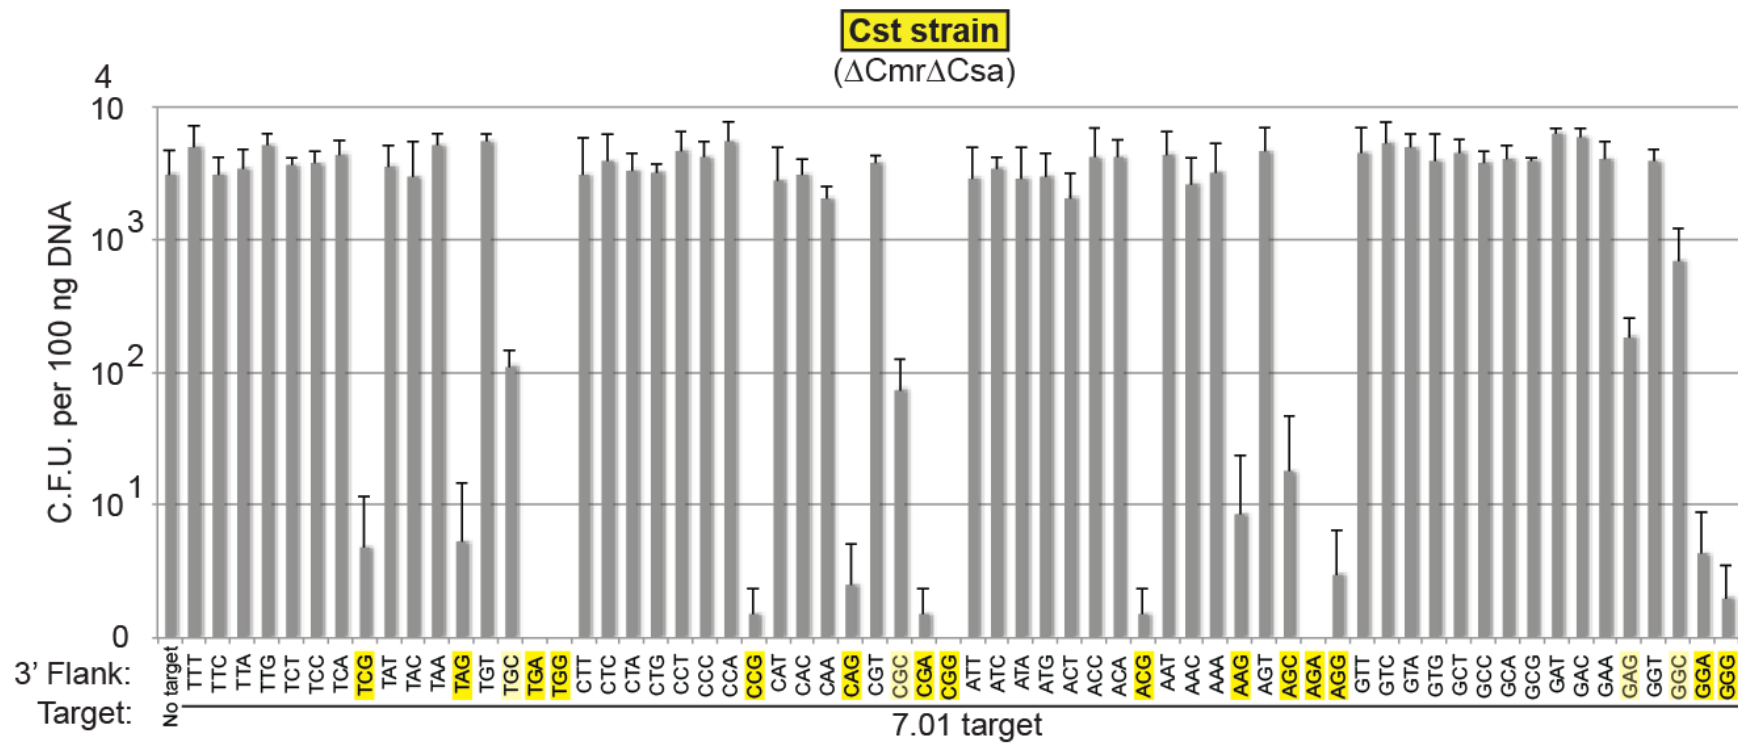

**Supplemental Figure S2. *P. furiosus* Cst plasmid interference PAM requirements.** Plot of plasmid challenge assay results in *Pfu* strain harboring the Cst CRISPR-Cas system. Colony forming units are plotted on the Y-axis, with the standard deviation in at least 3 replicates indicated by error bars. The CRISPR target and the sequence immediately downstream (3' flank) are indicated on the X-axis. Yellow boxes indicate plasmids with flanking sequences that are utilized as PAMs (dark) or weak PAMs (light) by the Cst system.

### Supplemental Figure S3

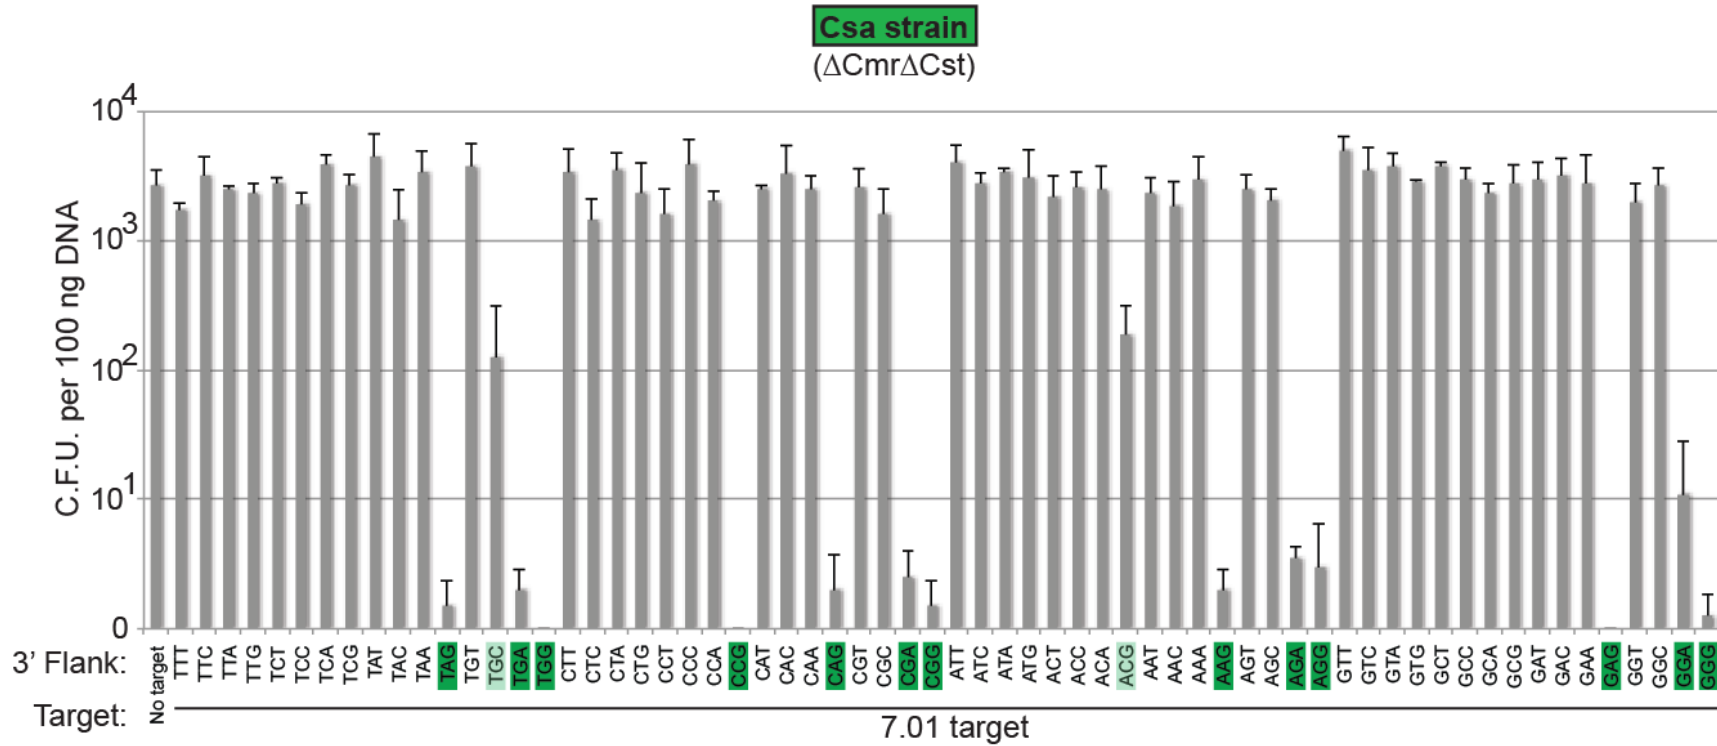

**Supplemental Figure S3. *P. furiosus* Csa plasmid interference PAM requirements.** Plot of plasmid challenge assay results in *Pfu* strain harboring the Csa CRISPR-Cas system. Colony forming units are plotted on the Y-axis, with the standard deviation in at least 3 replicates indicated by error bars. The CRISPR target and the sequence immediately downstream (3' flank) are indicated on the X-axis. Green boxes indicate plasmids with flanking sequence that are utilized as PAMs (dark) or weak PAMs (light) by the Csa system.

## Supplemental Figure S4

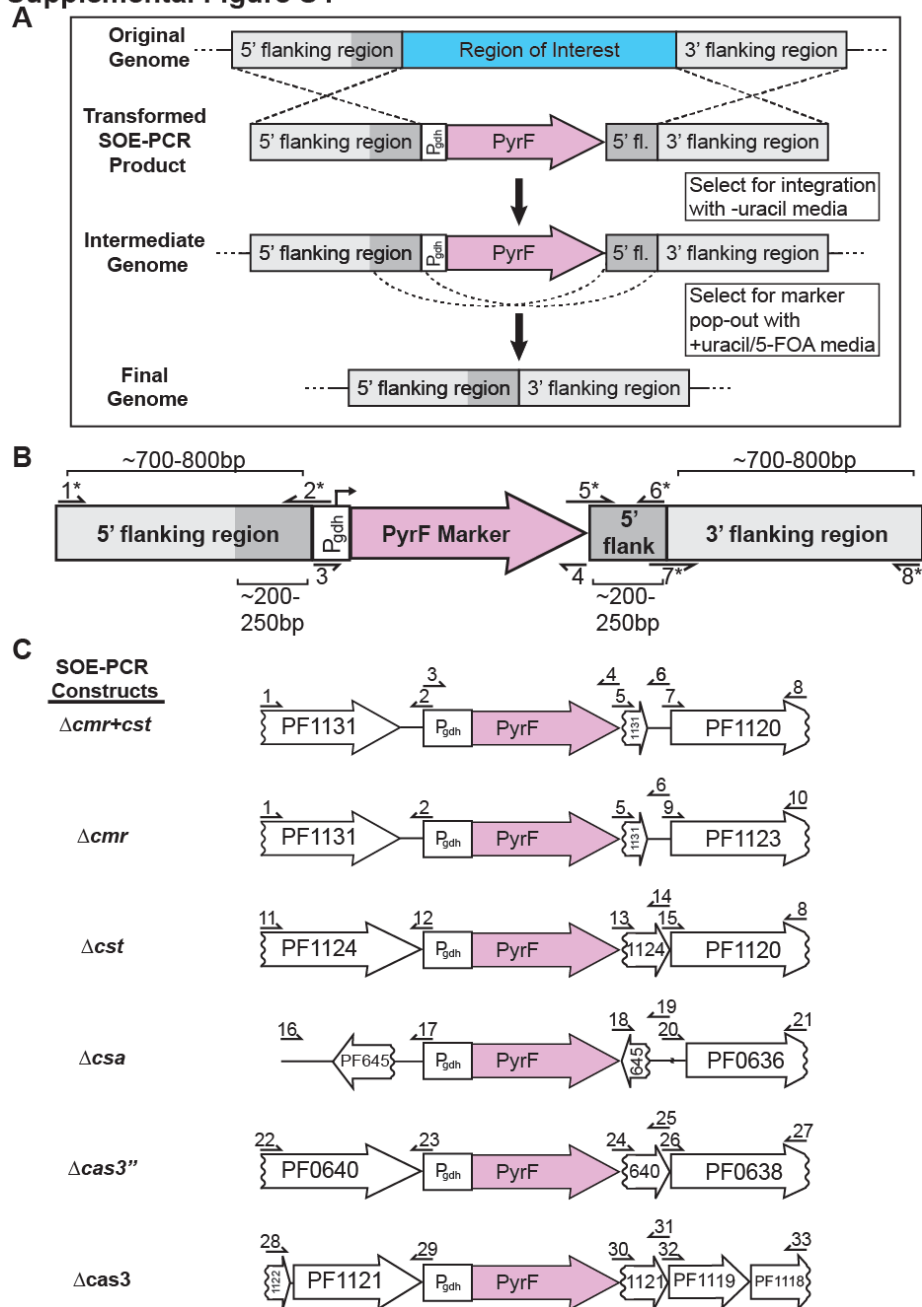

**Supplemental Figure S4. Construction of *Pf* strains.** (A) Graphic representation of the steps involved in *Pf* strain construction by homologous recombination of transformed SOE-PCR (splicing by overlap extension polymerase chain reaction) constructs. (B) Detailed graphic representation of a generic SOE-PCR construct containing the PyrF expression cassette, with approximate sizes and primer locations indicated. (C) Graphic representation of the individual SOE-PCR constructs used for strain construction in this study. Annotated *Pf* ORF numbers are indicated. Primer numbers refer to oligos in Table S2.

**Table S1 - Strains and Plasmids**

| <u><b><i>E. coli</i> Strains</b></u>     | <u><b>Relevant Characteristics</b></u>                                                                                                                                                                                                         | <u><b>Source or Reference</b></u> |
|------------------------------------------|------------------------------------------------------------------------------------------------------------------------------------------------------------------------------------------------------------------------------------------------|-----------------------------------|
| Top10                                    | F- <i>mcrA</i> $\Delta$ ( <i>mrr-hsdRMS-mcrBC</i> ) $\Phi$ 80 <i>lacZ</i> $\Delta$ M15 $\Delta$ <i>lacX74</i> <i>recA1</i> <i>araD139</i> $\Delta$ ( <i>ara leu</i> ) 7697 <i>galU</i> <i>galK</i> <i>rpsL</i> (StrR) <i>endA1</i> <i>nupG</i> | Life Technologies                 |
| <br>                                     |                                                                                                                                                                                                                                                |                                   |
| <u><b><i>P. furiosus</i> Strains</b></u> | <u><b>Relevant Characteristics</b></u>                                                                                                                                                                                                         | <u><b>Source or Reference</b></u> |
| JFW02 (WT)                               | $\Delta$ <i>pyrF</i> $\Delta$ <i>trpAB</i>                                                                                                                                                                                                     | (1)                               |
| TPF01 ( $\Delta$ Cas3")                  | JFW02 $\Delta$ <i>cas3</i> "                                                                                                                                                                                                                   | This study                        |
| TPF02 ( $\Delta$ Cas3)                   | JFW02 $\Delta$ <i>cas3</i>                                                                                                                                                                                                                     | This study                        |
| TPF04 ( $\Delta$ Csa)                    | JFW02 $\Delta$ <i>csa</i> ( $\Delta$ PF0637-0644)                                                                                                                                                                                              | This study                        |
| TPF06 ( $\Delta$ Cmr)                    | JFW02 $\Delta$ <i>cmr</i> ( $\Delta$ PF1124-PF1130)                                                                                                                                                                                            | This study                        |
| TPF07 (Csa)                              | JFW02 $\Delta$ <i>cmr+cst</i> ( $\Delta$ PF1121-PF1130)                                                                                                                                                                                        | This study                        |
| TPF10 ( $\Delta$ Cas3, $\Delta$ Cas3")   | TPF01 $\Delta$ <i>cas3</i>                                                                                                                                                                                                                     | This study                        |
| TPF15 (Cmr)                              | TPF04 $\Delta$ <i>cst</i> ( $\Delta$ PF1121-1123)                                                                                                                                                                                              | This study                        |
| TPF17 (Cst)                              | TPF06 $\Delta$ <i>csa</i> ( $\Delta$ PF0637-0644)                                                                                                                                                                                              | This study                        |
| TPF20 (null)                             | TPF07 $\Delta$ <i>csa</i> ( $\Delta$ PF0637-0644)                                                                                                                                                                                              | This study                        |
| TPF29 (Cst $\Delta$ Cas3)                | TPF17 $\Delta$ <i>cas3</i> ( $\Delta$ PF1120)                                                                                                                                                                                                  | This study                        |
| TPF30 (Csa $\Delta$ Cas3")               | TPF07 $\Delta$ <i>cas3</i> " ( $\Delta$ PF0639)                                                                                                                                                                                                | This study                        |
| <br>                                     |                                                                                                                                                                                                                                                |                                   |
| <u><b>Plasmids</b></u>                   | <u><b>Relevant Characteristics</b></u>                                                                                                                                                                                                         | <u><b>Source or Reference</b></u> |
| pJFW17                                   | AprR general cloning vector with <i>E. coli</i> OriT, and <i>Pfu</i> Pgdh-pyrF cassette                                                                                                                                                        | (2)                               |
| pJFW18                                   | pJFW17 derivative; <i>Pfu</i> OriC for replication in <i>P. furiosus</i>                                                                                                                                                                       | (2)                               |
| pJE18                                    | pJFW18 derivative; 7.01 spacer, GGG flank                                                                                                                                                                                                      | This study                        |
| pJE19                                    | pJFW18 derivative; 7.01 spacer, 5' tag complement flank                                                                                                                                                                                        | This study                        |
| pJE20                                    | pJFW18 derivative; 1.01 spacer, GGG flank                                                                                                                                                                                                      | This study                        |
| pJE21                                    | pJFW18 derivative; 1.01 spacer, 5' tag complement flank                                                                                                                                                                                        | This study                        |
| pJE22                                    | pJFW18 derivative; 7.01 spacer, GGG flank, reverse orientation                                                                                                                                                                                 | This study                        |
| pJE31                                    | pJFW18 derivative; 7.01 spacer, GCA flank                                                                                                                                                                                                      | This study                        |
| pJE33                                    | pJFW18 derivative; 1.01 spacer, GCA flank                                                                                                                                                                                                      | This study                        |
| pJE47                                    | pJFW18 derivative; Tk-csg promoter/Tk-chiA terminator expression cassette                                                                                                                                                                      | This study                        |
| pJE186                                   | pJE47 derivative; 7.01 spacer, TTT flank                                                                                                                                                                                                       | This study                        |
| pJE187                                   | pJE47 derivative; 7.01 spacer, TTC flank                                                                                                                                                                                                       | This study                        |
| pJE188                                   | pJE47 derivative; 7.01 spacer, TTA flank                                                                                                                                                                                                       | This study                        |
| pJE189                                   | pJE47 derivative; 7.01 spacer, TTG flank                                                                                                                                                                                                       | This study                        |
| pJE190                                   | pJE47 derivative; 7.01 spacer, TCT flank                                                                                                                                                                                                       | This study                        |
| pJE191                                   | pJE47 derivative; 7.01 spacer, TCC flank                                                                                                                                                                                                       | This study                        |
| pJE192                                   | pJE47 derivative; 7.01 spacer, TCA flank                                                                                                                                                                                                       | This study                        |
| pJE193                                   | pJE47 derivative; 7.01 spacer, TCG flank                                                                                                                                                                                                       | This study                        |
| pJE194                                   | pJE47 derivative; 7.01 spacer, TAT flank                                                                                                                                                                                                       | This study                        |
| pJE195                                   | pJE47 derivative; 7.01 spacer, TAC flank                                                                                                                                                                                                       | This study                        |
| pJE196                                   | pJE47 derivative; 7.01 spacer, TAA flank                                                                                                                                                                                                       | This study                        |
| pJE197                                   | pJE47 derivative; 7.01 spacer, TAG flank                                                                                                                                                                                                       | This study                        |
| pJE198                                   | pJE47 derivative; 7.01 spacer, TGT flank                                                                                                                                                                                                       | This study                        |
| pJE199                                   | pJE47 derivative; 7.01 spacer, TGC flank                                                                                                                                                                                                       | This study                        |
| pJE200                                   | pJE47 derivative; 7.01 spacer, TGA flank                                                                                                                                                                                                       | This study                        |
| pJE201                                   | pJE47 derivative; 7.01 spacer, TGG flank                                                                                                                                                                                                       | This study                        |
| pJE202                                   | pJE47 derivative; 7.01 spacer, CTT flank                                                                                                                                                                                                       | This study                        |
| pJE203                                   | pJE47 derivative; 7.01 spacer, CTC flank                                                                                                                                                                                                       | This study                        |

| <b><u>Plasmids</u></b> | <b><u>Relevant Characteristics</u></b>                 | <b><u>Source or Reference</u></b> |
|------------------------|--------------------------------------------------------|-----------------------------------|
| pJE204                 | pJE47 derivative; 7.01 spacer, CTA flank               | This study                        |
| pJE205                 | pJE47 derivative; 7.01 spacer, CTG flank               | This study                        |
| pJE206                 | pJE47 derivative; 7.01 spacer, CCT flank               | This study                        |
| pJE207                 | pJE47 derivative; 7.01 spacer, CCC flank               | This study                        |
| pJE208                 | pJE47 derivative; 7.01 spacer, CCA flank               | This study                        |
| pJE209                 | pJE47 derivative; 7.01 spacer, CCG flank               | This study                        |
| pJE210                 | pJE47 derivative; 7.01 spacer, CAT flank               | This study                        |
| pJE211                 | pJE47 derivative; 7.01 spacer, CAC flank               | This study                        |
| pJE212                 | pJE47 derivative; 7.01 spacer, CAA flank               | This study                        |
| pJE213                 | pJE47 derivative; 7.01 spacer, CAG flank               | This study                        |
| pJE214                 | pJE47 derivative; 7.01 spacer, CGT flank               | This study                        |
| pJE215                 | pJE47 derivative; 7.01 spacer, CGC flank               | This study                        |
| pJE216                 | pJE47 derivative; 7.01 spacer, CGA flank               | This study                        |
| pJE217                 | pJE47 derivative; 7.01 spacer, CGG flank               | This study                        |
| pJE218                 | pJE47 derivative; 7.01 spacer, ATT flank               | This study                        |
| pJE219                 | pJE47 derivative; 7.01 spacer, ATC flank               | This study                        |
| pJE220                 | pJE47 derivative; 7.01 spacer, ATA flank               | This study                        |
| pJE221                 | pJE47 derivative; 7.01 spacer, ATG flank               | This study                        |
| pJE222                 | pJE47 derivative; 7.01 spacer, ACT flank               | This study                        |
| pJE223                 | pJE47 derivative; 7.01 spacer, ACC flank               | This study                        |
| pJE224                 | pJE47 derivative; 7.01 spacer, ACA flank               | This study                        |
| pJE225                 | pJE47 derivative; 7.01 spacer, ACG flank               | This study                        |
| pJE226                 | pJE47 derivative; 7.01 spacer, AAT flank               | This study                        |
| pJE227                 | pJE47 derivative; 7.01 spacer, AAC flank               | This study                        |
| pJE228                 | pJE47 derivative; 7.01 spacer, AAA flank               | This study                        |
| pJE229                 | pJE47 derivative; 7.01 spacer, AAG flank               | This study                        |
| pJE230                 | pJE47 derivative; 7.01 spacer, AGT flank               | This study                        |
| pJE231                 | pJE47 derivative; 7.01 spacer, AGC flank               | This study                        |
| pJE232                 | pJE47 derivative; 7.01 spacer, AGA flank               | This study                        |
| pJE233                 | pJE47 derivative; 7.01 spacer, AGG flank               | This study                        |
| pJE234                 | pJE47 derivative; 7.01 spacer, GTT flank               | This study                        |
| pJE235                 | pJE47 derivative; 7.01 spacer, GTC flank               | This study                        |
| pJE236                 | pJE47 derivative; 7.01 spacer, GTA flank               | This study                        |
| pJE237                 | pJE47 derivative; 7.01 spacer, GTG flank               | This study                        |
| pJE238                 | pJE47 derivative; 7.01 spacer, GCT flank               | This study                        |
| pJE239                 | pJE47 derivative; 7.01 spacer, GCC flank               | This study                        |
| pJE240                 | pJE47 derivative; 7.01 spacer, GCA flank               | This study                        |
| pJE241                 | pJE47 derivative; 7.01 spacer, GCG flank               | This study                        |
| pJE242                 | pJE47 derivative; 7.01 spacer, GAT flank               | This study                        |
| pJE243                 | pJE47 derivative; 7.01 spacer, GAC flank               | This study                        |
| pJE244                 | pJE47 derivative; 7.01 spacer, GAA flank               | This study                        |
| pJE245                 | pJE47 derivative; 7.01 spacer, GAG flank               | This study                        |
| pJE246                 | pJE47 derivative; 7.01 spacer, GGT flank               | This study                        |
| pJE247                 | pJE47 derivative; 7.01 spacer, GGC flank               | This study                        |
| pJE248                 | pJE47 derivative; 7.01 spacer, GGA flank               | This study                        |
| pJE249                 | pJE47 derivative; 7.01 spacer, GGG flank               | This study                        |
| pJE252                 | pJE47 derivative; Pfu Cas3 (PF1120) expression vector  | This study                        |
| pJE253                 | pJE47 derivative; Pfu Cas3" (PF0639) expression vector | This study                        |
| pJE257                 | pJE253 derivative; 7.01 spacer, GGG flank              | This study                        |
| pJE258                 | pJE252 derivative; 7.01 spacer, GGG flank              | This study                        |

| <b><u>Plasmids</u></b> | <b><u>Relevant Characteristics</u></b>                                                | <b><u>Source or Reference</u></b> |
|------------------------|---------------------------------------------------------------------------------------|-----------------------------------|
| pJE269                 | pJE47 derivative; Pfu Cas3'+3" (PF0639/PF0640) expression vector                      | This study                        |
| pJE270                 | pJE269 derivative; 7.01 spacer, GGG flank                                             | This study                        |
| pJE275                 | pJE47 derivative; 6.01 spacer, GGG flank                                              | This study                        |
| pJE299                 | pJE47 derivative; 6.01 spacer, AAA flank                                              | This study                        |
| pJE300                 | pJE47 derivative; 6.01 spacer, CCC flank                                              | This study                        |
| pJE301                 | pJE47 derivative; 6.01 spacer, TTT flank                                              | This study                        |
| pLC64-ChiA             | <i>T.kodakaraensis</i> shuttle vector with P <sub>cs</sub> g-ChiA expression cassette | (3)                               |



**Table S2****Northern Probe Oligos**

| Northern Probe               | Sequence (5'-3')                |
|------------------------------|---------------------------------|
| Repeat antisense (835)       | CTTTC AATTCTTTTGTAGTCTTATTGGAAC |
| 6.01 antisense (898)         | CTAAGGACATTTGTACGTCAAATTCCTCAC  |
| 7.01 antisense (883)         | GCTCTCAGCCGCAAGGACCGCATAAC      |
| Pfu 5S rRNA antisense (1008) | CCCGGCTTCCCGCCCCCTCT            |

**SOE-PCR Construct Primer Oligos**

| Primer          | Sequence (5'-3')                                          |
|-----------------|-----------------------------------------------------------|
| Pgdh_PyrF_F (3) | GATTGAAAATGGAGTGAGCTGAG                                   |
| Pgdh_PyrF_R (4) | TTATCTTGAGCTCCATTCCTTCACC                                 |
| ΔCmr_1 (1)      | TCCAATCCGAAGCTTGCAACATA                                   |
| ΔCmr_2 (2)      | CTCAGCTCACTCCATTTTCAATCGCTACCTCACCGAGCCAAATAAAGTG         |
| ΔCmr_5 (5)      | GGTGAAAGAATGGAGCTCAAGATAAATGTTCCGCTTCGGAATGGTTAAGG        |
| ΔCmr_6 (6)      | GCTACCTCACCGAGCCAAATAAAGTG                                |
| ΔCmr_7 (9)      | CACTTTATTTGGCTCGGTGAGGTAGCTTGCCGTTGGTGGCAGAGATAG          |
| ΔCmr_8 (10)     | GCCTTTGGTACCCTCTCCAGA                                     |
| ΔCmr+Cst_7 (7)  | CACTTTATTTGGCTCGGTGAGGTAGCATGAAACCGTGCTTTGCAAAAATTTCTTC   |
| ΔCst_1 (11)     | TCGTTGCCAATTGAAACTAAGGT                                   |
| ΔCst_2 (12)     | CTCAGCTCACTCCATTTTCAATCCTAAACATATTCACAAGCCTCCCATAG        |
| ΔCst_5 (13)     | GGTGAAAGAATGGAGCTCAAGATAAATGTTCCACCTCCTGGGGACT            |
| ΔCst_6 (14)     | CTAAACATATTCACAAGCCTCCCATAG                               |
| ΔCst_7 (15)     | CTATGGGAGGCTTGTGTAATATGTTTAGATGAAACCGTGCTTTGCAAAAATTTCTTC |
| ΔCst_8 (8)      | GGGCCGCTTCAGTCTTTCCATA                                    |
| ΔCsa_1 (16)     | GGATTTTGTATTGCCTCACGGTTA                                  |
| ΔCsa_2 (17)     | CTCAGCTCACTCCATTTTCAATCGTTTTTCTGTATCGAATATTCCTCCGAATG     |
| ΔCsa_5 (18)     | GGTGAAAGAATGGAGCTCAAGATAATCCAGGTTCTGGTTTGACAAG            |
| ΔCsa_6 (19)     | GTTTTTCTGTATCGAATATTCCTCCGAATG                            |
| ΔCsa_7 (20)     | CATTCGGGGAATATTCGATACAGAAAAACAGCTTTATCTTTTCCATAACCATTAGG  |
| ΔCsa_8 (21)     | TGGCTCCCTTAACTCGCTGGA                                     |
| ΔPF0639_1 (22)  | ACGTTGGTGACATTGACACTGC                                    |
| ΔPF0639_2 (23)  | CTCAGCTCACTCCATTTTCAATCTCATACTCTCACCCCCAGTTTTTCG          |
| ΔPF0639_5 (24)  | GGTGAAAGAATGGAGCTCAAGATAAATGGGTATGGAAAGTTCGGAAATCA        |
| ΔPF0639_6 (25)  | TCATACTCTCACCCCCAGTTTTTCG                                 |
| ΔPF0639_7 (26)  | CGAAAAC TGGGGGTGAGAGTATGAGGGGAAGTTAAATGAAGCTTG            |
| ΔPF0639_8 (27)  | GAGCCAGGCACTTCTTCAG                                       |
| ΔPF1120_1 (28)  | GAGCTAGGACTGGACATAGAGGCA                                  |
| ΔPF1120_2 (29)  | CTCAGCTCACTCCATTTTCAATCTCATGGCCTCCACCTATGCAGATAAAC        |
| ΔPF1120_5 (30)  | GGTGAAAGAATGGAGCTCAAGATAAGCTCCAATAGGAGGGACAGTTG           |
| ΔPF1120_6 (31)  | TCATGGCCTCCACCTATGCAGATAAAC                               |

|                |                                                       |
|----------------|-------------------------------------------------------|
| ΔPF1120_7 (32) | GTTTATCTGCATAGGTGGAGGCCATGAATGGAAGAGTACGCCCTTAGAGGAGC |
| ΔPF1120_8 (33) | TGGCTCCTCCAACCACAAAAG                                 |

\*numbers in parentheses refer to Figure S4, panel C labels

### PCR Screening Oligos

| Primer           | Sequence (5'-3')         |
|------------------|--------------------------|
| ΔCmr+Cst_seq_For | TTGGAGATAGGTTACGTGGT     |
| ΔCmr+Cst_seq_Rev | AAATCCCTGATGAGCTGTGG     |
| ΔCmr+Cst_seq_Int | CTGGGCTTCGGAATGGTTAAGG   |
| ΔCmr_seq_For     | TTGGAGATAGGTTACGTGGT     |
| ΔCmr_seq_Rev     | GCGTGAGCCACAAATCTAGTC    |
| ΔCsa_seq_For     | CGAGATTGAAACAGGAGCTG     |
| ΔCsa_seq_Rev     | TTGGGAGGAGCTGTAATTGG     |
| ΔCsa_seq_Int     | TCCCAGGTTCTGGTTTGACAAG   |
| ΔCst_seq_For     | CCTGGGGGAGAGACAGAACT     |
| ΔCst_seq_Rev     | AAATCCCTGATGAGCTGTGG     |
| ΔCst_seq_Int     | ATGTCCCACCTCTGGGGACT     |
| ΔPF0639_seq_For  | ACCGGAGAAGAAGGAGAAG      |
| ΔPF0639_seq_Rev  | GCACGTGCTTTCAAGTATCC     |
| ΔPF0639_seq_Int  | TGGGTATGGAAAGTTCGGAAATCA |
| ΔPF1120_seq_For  | CCTGGGGATAATTGTCAACG     |
| ΔPF1120_seq_Rev  | CCTGCCTAATTCTTCCCTCA     |
| ΔPF1120_seq_Int  | GCTCCAATAGGAGGGACAGTTG   |

### Oligos for Target Cloning

| Oligos           | Sequence (5'-3')                                                                  |
|------------------|-----------------------------------------------------------------------------------|
| Pf_7.01_GGG+     | [ Phos ]GGCCGCCTCGGATCCCTTGTAGTATGCGGTCCCTTGCGGCTGAGAGCACTTCAGAGGATCCGC           |
| Pf_7.01_GGG-     | [ Phos ]GGCCGCGGATCCTCTGAAGTGCTCTCAGCCGCAAGGACCGCATACTACAAGGGATCCGAGGC            |
| Pf_7.01_tagcomp+ | [ Phos ]GGCCGCCTATTGAAAGTTGTTAGTATGCGGTCCCTTGCGGCTGAGAGCACTTCAGAGGATCCGC          |
| Pf_7.01_tagcomp- | [ Phos ]GGCCGCGGATCCTCTGAAGTGCTCTCAGCCGCAAGGACCGCATACTACAACTTTCAATAGGC            |
| Pf_1.01_GGG+     | [ Phos ]GGCCGCCTCGGATCCCTTATATGATTCATTTCTTGTCTTAAGCAATCTGATCTGACAGAGCTGAGGATCCGC  |
| Pf_1.01_GGG-     | [ Phos ]GGCCGCGGATCCTCAGCTCTGGTCAGATCAGATTGCTTAAGACAAGAAATGAATCATATAAGGGATCCGAGGC |
| Pf_1.01_tagcomp+ | [ Phos ]GGCCGCCTATTGAAAGTTATATGATTCATTTCTTGTCTTAAGCAATCTGATCTGACAGAGCTGAGGATCCGC  |
| Pf_1.01_tagcomp- | [ Phos ]GGCCGCGGATCCTCAGCTCTGGTCAGATCAGATTGCTTAAGACAAGAAATGAATCATATAACTTTCAATAGGC |
| Pf_1.01_GCA+     | [ Phos ]GGCCGCCTCGGATGCTTATATGATTCATTTCTTGTCTTAAGCAATCTGATCTGACAGAGCTGAGGATCCGC   |
| Pf_1.01_GCA-     | [ Phos ]GGCCGCGGATCCTCAGCTCTGGTCAGATCAGATTGCTTAAGACAAGAAATGAATCATATAAGCAATCCGAGGC |

|                    |                                                                                 |
|--------------------|---------------------------------------------------------------------------------|
| Pf_7.01_GCA+       | [ Phos ]GGCCGCCTCGGATTGCTTGTAGTATGCGGTCCCTTGC GGCTGAGAGCACTTCAGAGGATCCGC        |
| Pf_7.01_GCA-       | [ Phos ]GGCCGCGGATCCTCTGAAGTGCTCTCAGCCGCAAGGACCGCATACTACAAGCAATCCGAGGC          |
| 7.01 TIM Sat Mut_F | GGTGTGTCATATGGGTTCCTCTGAAGTGCTCTCAGCCGCAAGGACCGCATACTACAANNNTTCCGAGGGATCCCCCTCT |
| 7.01 TIM Sat Mut_R | AGAGGGGGGATCCCTCGGA                                                             |
| 701_NNN_TCC+       | [ Phos ]TATGGGtTCCTCTGAAGTGCTCTCAGCCGCAAGGACCGCATACTACAAtcctTCCGAGG             |
| 701_NNN_TCC-       | [ Phos ]GATCCCTCGGAaggaTTGTAGTATGCGGTCCCTTGC GGCTGAGAGCACTTCAGAGGAaCCCA         |
| 701_NNN_CCT+       | [ Phos ]TATGGGtTCCTCTGAAGTGCTCTCAGCCGCAAGGACCGCATACTACAAccttTCCGAGG             |
| 701_NNN_CCT-       | [ Phos ]GATCCCTCGGAaagTGTAGTATGCGGTCCCTTGC GGCTGAGAGCACTTCAGAGGAaCCCA           |
| 701_NNN_CAC+       | [ Phos ]TATGGGtTCCTCTGAAGTGCTCTCAGCCGCAAGGACCGCATACTACAAcactTCCGAGG             |
| 701_NNN_CAC-       | [ Phos ]GATCCCTCGGAagtTGTAGTATGCGGTCCCTTGC GGCTGAGAGCACTTCAGAGGAaCCCA           |
| 701_NNN_ATC+       | [ Phos ]TATGGGtTCCTCTGAAGTGCTCTCAGCCGCAAGGACCGCATACTACAAatctTCCGAGG             |
| 701_NNN_ATC-       | [ Phos ]GATCCCTCGGAagatTTGTAGTATGCGGTCCCTTGC GGCTGAGAGCACTTCAGAGGAaCCCA         |
| 701_NNN_ACC+       | [ Phos ]TATGGGtTCCTCTGAAGTGCTCTCAGCCGCAAGGACCGCATACTACAAacctTCCGAGG             |
| 701_NNN_ACC-       | [ Phos ]GATCCCTCGGAaggtTTGTAGTATGCGGTCCCTTGC GGCTGAGAGCACTTCAGAGGAaCCCA         |
| 701_NNN_AAT+       | [ Phos ]TATGGGtTCCTCTGAAGTGCTCTCAGCCGCAAGGACCGCATACTACAAaatTCCGAGG              |
| 701_NNN_AAT-       | [ Phos ]GATCCCTCGGAaatTTGTAGTATGCGGTCCCTTGC GGCTGAGAGCACTTCAGAGGAaCCCA          |
| 701_NNN_TAC+       | [ Phos ]TATGGGtTCCTCTGAAGTGCTCTCAGCCGCAAGGACCGCATACTACAAtactTCCGAGG             |
| 701_NNN_TAC-       | [ Phos ]GATCCCTCGGAagtaTTGTAGTATGCGGTCCCTTGC GGCTGAGAGCACTTCAGAGGAaCCCA         |
| 701_NNN_CTT+       | [ Phos ]TATGGGtTCCTCTGAAGTGCTCTCAGCCGCAAGGACCGCATACTACAAactttTCCGAGG            |
| 701_NNN_CTT-       | [ Phos ]GATCCCTCGGAaaagTTGTAGTATGCGGTCCCTTGC GGCTGAGAGCACTTCAGAGGAaCCCA         |
| 701_NNN_CCA+       | [ Phos ]TATGGGtTCCTCTGAAGTGCTCTCAGCCGCAAGGACCGCATACTACAAccatTCCGAGG             |
| 701_NNN_CCA-       | [ Phos ]GATCCCTCGGAatggTTGTAGTATGCGGTCCCTTGC GGCTGAGAGCACTTCAGAGGAaCCCA         |
| 701_NNN_CAG+       | [ Phos ]TATGGGtTCCTCTGAAGTGCTCTCAGCCGCAAGGACCGCATACTACAacagtTCCGAGG             |
| 701_NNN_CAG-       | [ Phos ]GATCCCTCGGAactTGTAGTATGCGGTCCCTTGC GGCTGAGAGCACTTCAGAGGAaCCCA           |
| 701_NNN_ACT+       | [ Phos ]TATGGGtTCCTCTGAAGTGCTCTCAGCCGCAAGGACCGCATACTACAAacttTCCGAGG             |
| 701_NNN_ACT-       | [ Phos ]GATCCCTCGGAaagtTTGTAGTATGCGGTCCCTTGC GGCTGAGAGCACTTCAGAGGAaCCCA         |
| 701_NNN_ACA+       | [ Phos ]TATGGGtTCCTCTGAAGTGCTCTCAGCCGCAAGGACCGCATACTACAAacatTCCGAGG             |

|              |                                                                            |
|--------------|----------------------------------------------------------------------------|
| 701_NNN_ACA- | [ Phos ] GATCCCTCGGAatgtTTGTAGTATGCGGTCCTTGCGGCTGAGAGCACTTCAGAGGA<br>aCCCA |
| 701_NNN_AAA+ | [ Phos ] TATGGGtTCCTCTGAAGTGCTCTCAGCCGCAAGGACCGCATACTACAAaaatTCCG<br>AGG   |
| 701_NNN_AAA- | [ Phos ] GATCCCTCGGAatTTGTAGTATGCGGTCCTTGCGGCTGAGAGCACTTCAGAGGA<br>aCCCA   |
| 701_NNN_AAG+ | [ Phos ] TATGGGtTCCTCTGAAGTGCTCTCAGCCGCAAGGACCGCATACTACAAaagtTCCG<br>AGG   |
| 701_NNN_AAG- | [ Phos ] GATCCCTCGGAactTTGTAGTATGCGGTCCTTGCGGCTGAGAGCACTTCAGAGGA<br>aCCCA  |
| 701_NNN_AGT+ | [ Phos ] TATGGGtTCCTCTGAAGTGCTCTCAGCCGCAAGGACCGCATACTACAAagtTCCG<br>AGG    |
| 701_NNN_AGT- | [ Phos ] GATCCCTCGGAaactTTGTAGTATGCGGTCCTTGCGGCTGAGAGCACTTCAGAGGA<br>aCCCA |
| 701_NNN_GTT+ | [ Phos ] TATGGGtTCCTCTGAAGTGCTCTCAGCCGCAAGGACCGCATACTACAAgtTTTCCG<br>AGG   |
| 701_NNN_GTT- | [ Phos ] GATCCCTCGGAaaacTTGTAGTATGCGGTCCTTGCGGCTGAGAGCACTTCAGAGGA<br>aCCCA |
| 701_NNN_GAC+ | [ Phos ] TATGGGtTCCTCTGAAGTGCTCTCAGCCGCAAGGACCGCATACTACAAgactTCCG<br>AGG   |
| 701_NNN_GAC- | [ Phos ] GATCCCTCGGAagtcTTGTAGTATGCGGTCCTTGCGGCTGAGAGCACTTCAGAGGA<br>aCCCA |
| 701_NNN_GAA+ | [ Phos ] TATGGGtTCCTCTGAAGTGCTCTCAGCCGCAAGGACCGCATACTACAAgaaTCCG<br>AGG    |
| 701_NNN_GAA- | [ Phos ] GATCCCTCGGAatTCCTGTAGTATGCGGTCCTTGCGGCTGAGAGCACTTCAGAGGA<br>aCCCA |
| 601_GGG+     | [ Phos ] TATGGGATCCTGTTCCACTAAGGACATTTGTACGTCAAATTCCTTACTgggATCCG<br>AGG   |
| 601_GGG-     | [ Phos ] GATCCCTCGGATcccAGTGAAGAATTTGACGTACAAATGTCTTAGTGGAACAGGA<br>TCCCA  |
| 601_AAA+     | [ phos ] TATGGGATCCTGTTCCACTAAGGACATTTGTACGTCAAATTCCTTACTaaaATCCG<br>AGG   |
| 601_AAA-     | [ phos ] GATCCCTCGGATtttAGTGAAGAATTTGACGTACAAATGTCTTAGTGGAACAGGA<br>TCCCA  |
| 601_CCC+     | [ phos ] TATGGGATCCTGTTCCACTAAGGACATTTGTACGTCAAATTCCTTACTcccATCCG<br>AGG   |
| 601_CCC-     | [ phos ] GATCCCTCGGATgggAGTGAAGAATTTGACGTACAAATGTCTTAGTGGAACAGGA<br>TCCCA  |
| 601_TTT+     | [ phos ] TATGGGATCCTGTTCCACTAAGGACATTTGTACGTCAAATTCCTTACTtttATCCG<br>AGG   |
| 601_TTT-     | [ phos ] GATCCCTCGGATAaaAGTGAAGAATTTGACGTACAAATGTCTTAGTGGAACAGGA<br>TCCCA  |

### Other Oligos

| Oligos          | Sequence (5' - 3')                        |
|-----------------|-------------------------------------------|
| Pcsg_F          | AACGAAGCGGCCGCTATCGGC AAAAGG              |
| ChiA_Term_R     | AACGAAGATATCGAGGAAGCGGAGGTTC CAAG         |
| Pcsg_NdeI_Bam_R | GGATCCGATTCGTTTCATATGACAACACCTTCCTTGGGTTG |

|                 |                                                       |
|-----------------|-------------------------------------------------------|
| Term_Ndel_Bam_F | GTTGTCATATGAACGAATCGGATCCCCCTCTCTTCCTCTTTTG           |
| PF1120_pJE47_F  | ccccaacaaccaaggaggtgtgtcatATGAAACCGTGCTTTGCAAAATTC    |
| PF1120_pJE47_R  | ggacaaaagaggagaagagaggggggatccTTAGAGAATATCCCCTCAC     |
| PF0639_pJE47_F  | ccccaacaaccaaggaggtgtgtcatATGAGTTGTAAGGCATTCCAA       |
| PF0639_pJE47_R  | ggacaaaagaggagaagagaggggggatccTCACTTCATCATTCAACTCTAAG |
| PF0640_pJE47_F  | ccccaacaaccaaggaggtgtgtcatATGGATACCGAAAACTCTTC        |

## References

1. Farkas, J., Stirrett, K., Lipscomb, G.L., Nixon, W., Scott, R.A., Adams, M.W. and Westpheling, J. (2012) Recombinogenic properties of *Pyrococcus furiosus* strain COM1 enable rapid selection of targeted mutants. *Applied and environmental microbiology*, **78**, 4669-4676.
2. Farkas, J., Chung, D., DeBarry, M., Adams, M.W. and Westpheling, J. (2011) Defining components of the chromosomal origin of replication of the hyperthermophilic archaeon *Pyrococcus furiosus* needed for construction of a stable replicating shuttle vector. *Applied and environmental microbiology*, **77**, 6343-6349.
3. Elmore, J.R., Yokooji, Y., Sato, T., Olson, S., Glover, C.V., 3rd, Graveley, B.R., Atomi, H., Terns, R.M. and Terns, M.P. (2013) Programmable plasmid interference by the CRISPR-Cas system in *Thermococcus kodakarensis*. *RNA biology*, **10**, 828-840.
